# Supplementary material
Source: publisher figshare collection journal article supplement (https://tandf.figshare.com/ndownloader/files/38855130)
Supplement: Supplementary file 1 [file 38855130]

Supplementary Table 1. Baseline characteristics and comparison analysis for the patients responding to the questionnaire and the non-responding patients.

| Variable | Responding patients  n (%) | Non-responding patients  n (%) | p-value |
| --- | --- | --- | --- |
| Number of patients | 271 (66) | 141 (34) |  |
| Gender  Male  Female | 149 (55)  122 (45) | 79 (56)  62 (44) | 0.9 |
| Age  Mean (range) | 60 (16-84) | 61 (20-86) | 0.3 |
| Center  Herlev  Odense  Aarhus  Aalborg | 146 (54)  55 (20)  44 (16)  26 (10) | 50 (35)  37 (26)  34 (24)  20 (14) | 0.004 |
| Melanoma subtype  Cutaneous  Mucosal  Unknown primary | 247 (91)  2 (1)  22 (8) | 130 (92)  1 (1)  10 (7) | 0.9 |
| Melanoma classification, AJCC 8th  Stage IIIA  Stage IIIB  Stage IIIC  Stage IIID  Stage IV | 41 (15)  110 (41)  83 (31)  1 (0)  36 (13) | 19 (13)  52 (37)  56 (40)  3 (2)  11 (8) | 0.09 |
| Performance status  0  1  ≥2  Missing | 242 (90)  26 (10)  0  3 | 116 (83)  22 (16)  2 (1)  1 | 0.02 |
| Charlson comorbidity index  1-2  3-4  ≥5 | 205 (76)  61 (23)  5 (2) | 98 (70)  38 (27)  5 (4) | 0.3 |
| In active treatment  Finalized treatment | 88 (32)  183 (68) | 50 (35)  91 (65) | 0.6 |
| Reason for stopping treatment  Finalized planned treatment  Stopped due to toxicity  Other | 103 (38)  70 (26)  10 (4) | 46 (33)  41 (29)  4 (3) | 0.6 |

Abbreviations: AJCC: American Joint Committee on Cancer
